# Supplementary material for: Combined Perioperative Lapatinib and Trastuzumab in Early HER2-Positive Breast Cancer Identifies Early Responders: Randomized UK EPHOS-B Trial Long-Term Results
Source: PubMed Central journal article supplement (PMC9610457; doi:10.1158/1078-0432.ccr-21-3177), 2022-02-14
Supplement: ccr-21-3177_supplementary_figure_10_supp10.pdf [file ccr-21-3177_supplementary_figure_10_supp10.pdf]

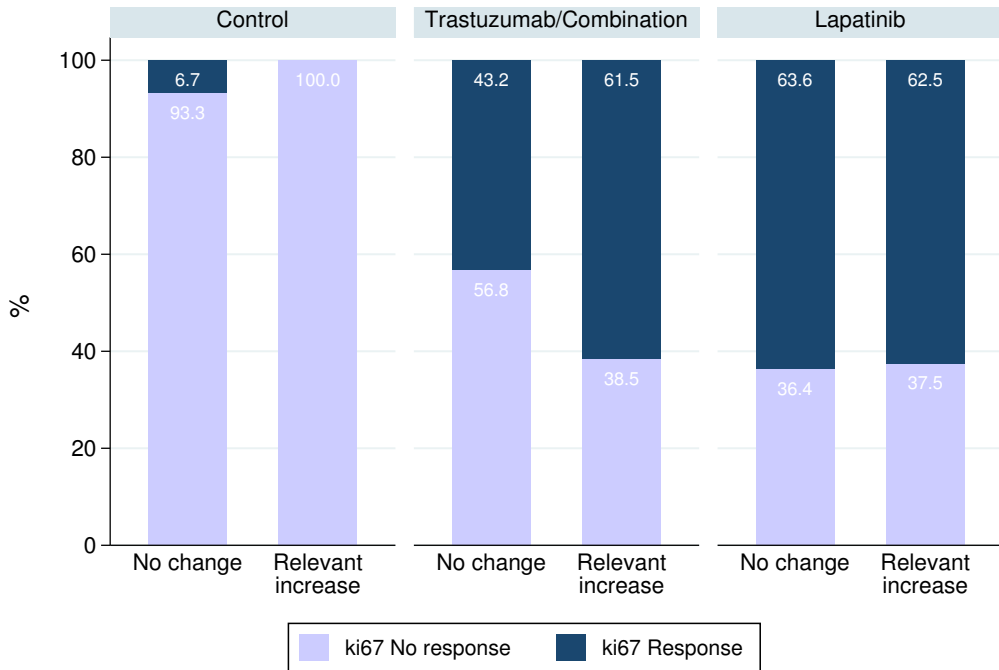

Graphs by arm\_comb1
